# Supplementary material for: QTL mapping for Fusarium wilt resistance based on the whole-genome resequencing and their association with functional genes in Raphanus sativus
Source: Research Square preprint supplement (doi:10.21203/rs.3.rs-208414/v1), 2021-02-18
Supplement: Supplementary file 1 [file 0b6359e23393711430caf8ed.xlsx]

## Sheet: Table S2
Additional file 1: Table S2. List of the genes in the FoRsR7.1FOR59 region that have sequence variations between the parental lines.
ID of gene	Chromosome	Position of gene		Function
Rs382850	R7	14447170	14449010	Product=leucine-rich repeat receptor protein kinase isoform 1 [BLAST2GO] | Best-Hit: PEP1 receptor 1 [AT1G73080]
Rs382200	R7	15038338	15040701	Product=probable lrr receptor-like serine threonine-protein kinase at1g74360-like [BLAST2GO] | Leucine-rich repeat protein kinase family protein [AT1G74360]
Rs382860	R7	14442625	14446587	Product=receptor-like protein kinase-like [BLAST2GO] | PEP1 receptor 1 [AT1G73080]
Rs382950	R7	14314234	14319173	Product=tir-nbs-lrr class disease resistance protein [BLAST2GO] | Best-Hit: Disease resistance protein (TIR-NBS-LRR class) [AT1G72840]
Rs382940	R7	14336249	14338394	Product=tmv resistance protein n-like [BLAST2GO] | Best-Hit: Disease resistance protein (TIR-NBS class) [AT4G09420]
Rs380750	R7	15967066	15967847	Product=Unknown protein
Rs380950	R7	16112742	16114484	Product=Unknown protein
Rs381090	R7	15592528	15593531	Product=Unknown protein
Rs381290	R7	15750596	15752421	Product=Unknown protein
Rs381310	R7	15776779	15777701	Product=uncharacterized protein [BLAST2GO] | Best-Hit: Unknown protein [AT1G76600]
Rs381320	R7	15797119	15798123	Product=uncharacterized protein [BLAST2GO] | Protein of Unknown function, DUF617 [AT1G76610]
Rs381330	R7	15798896	15801158	Product=Unknown protein
Rs381350	R7	15816766	15819341	Product=low quality protein: uncharacterized protein at1g76660-like [BLAST2GO] | Best-Hit: FUNCTIONS IN: molecular_function Unknown [AT1G76660]
Rs381540	R7	15408975	15411348	Product=uncharacterized protein [BLAST2GO] | Protein of Unknown function (DUF620) [AT1G75160]
Rs381550	R7	15403771	15404981	Product=uncharacterized membrane protein at1g75140-like [BLAST2GO] | Best-Hit: Unknown protein [AT1G75140]
Rs382060	R7	15132250	15132706	Product=Best-Hit: Protein of Unknown function, DUF601 [Bra039769]
Rs382390	R7	14954433	14955734	Product=Unknown protein
Rs382720	R7	14531043	14532670	Product=uncharacterized protein [BLAST2GO] | Best-Hit: Unknown protein [AT1G73350]
Rs381020	R7	15546847	15547928	Product=Best-Hit: f-box family protein [AT3G06240]
Rs381400	R7	15892779	15894286	Product=f-box family protein [BLAST2GO] | f-box family protein [AT1G76920]
Rs381640	R7	15360875	15362067	Product=f-box protein [BLAST2GO] | Best-Hit: f-box associated ubiquitination effector family protein [AT3G25090]
Rs380870	R7	16044751	16050703	Product=f-box protein skp2b [BLAST2GO] | RNI-like superfamily protein [AT1G77000]
Rs382790	R7	14481968	14483839	Product=f-box/RNI-like superfamily protein [AT5G02910]
Rs381970	R7	15198854	15199991	Product=myb transcription factor [BLAST2GO] | myb domain protein 31 [AT1G74650]
Rs382070	R7	15128844	15130807	Product=transcription factor myb95 [BLAST2GO] | myb domain protein 95 [AT1G74430]
Rs382080	R7	15116182	15118623	Product=transcription factor myb95 [BLAST2GO] | myb domain protein 95 [AT1G74430]
Rs381980	R7	15170803	15172898	Product=cytochrome p450 [BLAST2GO] | cytochrome P450, family 98, subfamily A, polypeptide 8 [AT1G74540]
Rs382780	R7	14492386	14493936	Product=nascent polypeptide-associated complex subunit beta [BLAST2GO] | Nascent polypeptide-associated complex NAC [AT1G73230]
Rs382110	R7	15084923	15086406	Product=pentatricopeptide repeat-containing protein [BLAST2GO] | Tetratricopeptide repeat (TPR)-like superfamily protein [AT1G74400]
Rs380840	R7	16031765	16035056	Product=pentatricopeptide repeat-containing protein mitochondrial-like [BLAST2GO] | Pentatricopeptide repeat (PPR) superfamily protein [AT1G77010]
Rs382430	R7	14913863	14916071	Product=alpha beta-hydrolase domain-containing protein [BLAST2GO] | alpha/beta-Hydrolases superfamily protein [AT1G73920]
Rs382470	R7	14911908	14915904	Product=lipase family protein [BLAST2GO] | alpha/beta-Hydrolases superfamily protein [AT1G73920]
Rs382680	R7	14569735	14573390	Product=monoglyceride lipase-like [BLAST2GO] | alpha/beta-Hydrolases superfamily protein [AT1G73480]
Rs380280	R7	16273575	16275730	Product=monoglyceride lipase-like [BLAST2GO] | alpha/beta-Hydrolases superfamily protein [AT1G77420]
Rs382370	R7	14962304	14963679	Product=60s ribosomal protein l6 [BLAST2GO] | Best-Hit: Ribosomal protein L6 family protein [AT1G74050]
Rs380070	R7	16322392	16323118	Product=acetyltransferase at1g77540-like [BLAST2GO] | Best-Hit: Acyl-CoA N-acyltransferases (NAT) superfamily protein [AT1G21770]
Rs380850	R7	16037445	16040381	Product=act domain-containing protein 3 [BLAST2GO] | ACT domain repeat 3 [AT1G76990]
Rs381840	R7	15303818	15307210	Product=adp-glucose pyrophosphorylase family protein [BLAST2GO] | ADP-glucose pyrophosphorylase family protein [AT1G74910]
Rs380110	R7	16360451	16364660	Product=arginine methyltransferase 4b [BLAST2GO] | Best-Hit: protein arginine methyltransferase 4B [AT3G06930]
Rs380290	R7	16280967	16289024	Product=armadillo beta-catenin-like repeat and c2 domain-containing protein [BLAST2GO] | C2 calcium/lipid-binding domain (CaLB) protein [AT1G77460]
Rs380380	R7	16221526	16224012	Product=at1g19700 [BLAST2GO] | Best-Hit: BEL1-like homeodomain 3 [AT1G75410]
Rs380410	R7	16239438	16242106	Product=auxin-induced protein 5ng4-like [BLAST2GO] | Walls Are Thin 1 [AT1G75500]
Rs380370	R7	16200233	16201372	Product=basic leucine-zipper 44 [BLAST2GO] | basic leucine-zipper 44 [AT1G75390]
Rs380360	R7	16196174	16196984	Product=Best-Hit: BEST Arabidopsis thaliana protein match is: Ribonuclease H-like superfamily protein (TAIR:AT4G29090.1) [AT2G22440]
Rs382880	R7	14425304	14426338	Product=Best-Hit: Galactose oxidase/kelch repeat superfamily protein [AT2G44030]
Rs381920	R7	15258784	15260059	Product=Best-Hit: RNA-directed DNA polymerase (reverse transcriptase)-related family protein [AT3G24255]
Rs381340	R7	15808412	15809189	Product=calcium-binding protein cml38 [BLAST2GO] | calmodulin-like 38 [AT1G76650]
Rs381490	R7	15447069	15451879	Product=cytosolic purine 5 -nucleotidase-like [BLAST2GO] | HAD-superfamily hydrolase, subfamily IG, 5'-nucleotidase [AT1G75210]
Rs380700	R7	16130315	16135219	Product=dead-box atp-dependent rna helicase 29-like [BLAST2GO] | helicases [AT1G77030]
Rs380390	R7	16233044	16234202	Product=dehydration-responsive element-binding protein 2d-like [BLAST2GO] | Integrase-type DNA-binding superfamily protein [AT1G75490]
Rs382310	R7	14992880	14993963	Product=desulfoglucosinolate sulfotransferase [BLAST2GO] | Best-Hit: sulfotransferase 16 [AT1G74100]
Rs381300	R7	15756657	15757544	Product=dna-binding protein escarola-like [BLAST2GO] | Predicted AT-hook DNA-binding family protein [AT1G76500]
Rs382560	R7	14660696	14662805	Product=ethylene insensitive 3-like 3 [BLAST2GO] | ETHYLENE-INSENSITIVE3-like 3 [AT1G73730]
Rs381790	R7	15332300	15333399	Product=ethylene-responsive transcription factor erf017-like [BLAST2GO] | Integrase-type DNA-binding superfamily protein [AT1G74930]
Rs381740	R7	15352715	15356348	Product=fatty acid biosynthesis 1 isoform 1 [BLAST2GO] | fatty acid biosynthesis 1 [AT1G74960]
Rs382100	R7	15087557	15089618	Product=fucosyltransferase 3 [BLAST2GO] | fucosyltransferase 3 [AT1G74420]
Rs381870	R7	15294242	15297172	Product=galactosyltransferase family protein [BLAST2GO] | Galactosyltransferase family protein [AT1G74800]
Rs382050	R7	15140048	15142118	Product=gdsl esterase lipase at1g74460-like [BLAST2GO] | GDSL-like Lipase/Acylhydrolase superfamily protein [AT1G74460]
Rs381860	R7	15298271	15298951	Product=germin-like protein subfamily t member 2-like [BLAST2GO] | RmlC-like cupins superfamily protein [AT1G74820]
Rs382210	R7	15034520	15036846	Product=glycerophosphoryl diester phosphodiesterase [BLAST2GO] | PLC-like phosphodiesterases superfamily protein [AT1G74210]
Rs381280	R7	15742279	15744828	Product=glycosyl hydrolase family protein [BLAST2GO] | Glycosyl hydrolase family protein [AT3G47040]
Rs382140	R7	15076465	15079982	Product=heat shock protein 101 [BLAST2GO] | heat shock protein 101 [AT1G74310]
Rs382710	R7	14533820	14537845	Product=homeobox-leucine zipper protein hdg11-like [BLAST2GO] | homeodomain GLABROUS 11 [AT1G73360]
Rs381940	R7	15244762	15249344	Product=isochorismate synthase 2 [BLAST2GO] | ADC synthase superfamily protein [AT1G74710]
Rs382690	R7	14557423	14562034	Product=kinase family protein [BLAST2GO] | Protein kinase superfamily protein [AT1G73460]
Rs382500	R7	14892865	14897879	Product=kinesin motor protein [BLAST2GO] | P-loop containing nucleoside triphosphate hydrolases superfamily protein [AT1G73860]
Rs380080	R7	16324829	16328355	Product=long chain acyl- synthetase 9 [BLAST2GO] | long chain acyl-CoA synthetase 9 [AT1G77590]
Rs381360	R7	15825100	15827182	Product=methenyltetrahydrofolate synthase domain-containing [BLAST2GO] | NagB/RpiA/CoA transferase-like superfamily protein [AT1G76730]
Rs382670	R7	14574632	14575936	Product=mitogen-activated protein kinase kinase [BLAST2GO] | MAP kinase kinase 9 [AT1G73500]
Rs381050	R7	15576515	15579893	Product=nadp-malic enzyme 4 [BLAST2GO] | NADP-malic enzyme 4 [AT1G79750]
Rs381880	R7	15291227	15293642	Product=nodulin-like and major facilitator domain-containing protein [BLAST2GO] | Nodulin-like / Major Facilitator Superfamily protein [AT1G74780]
Rs382960	R7	14308932	14310662	Product=nuclear transcription factor y subunit a-8 [BLAST2GO] | Best-Hit: nuclear factor Y, subunit A3 [AT1G72830]
Rs382640	R7	14603835	14608896	Product=phosphoethanolamine n-methyltransferase 3 [BLAST2GO] | S-adenosyl-L-methionine-dependent methyltransferases superfamily protein [AT1G73600]
Rs381990	R7	15168558	15170116	Product=predicted protein [Arabidopsis lyrata subsp. lyrata] [XP_002874185]
Rs381000	R7	15530853	15532892	Product=probable pre-mrna-splicing factor atp-dependent rna helicase-like [BLAST2GO] | Best-Hit: RNA helicase family protein [AT2G47250]
Rs380980	R7	15517602	15519288	Product=probable salt tolerance-like protein at1g75540-like [BLAST2GO] | salt tolerance homolog2 [AT1G75540]
Rs382020	R7	15147553	15149941	Product=protein kinase 2b [BLAST2GO] | Protein kinase superfamily protein [AT1G74490]
Rs382540	R7	14670234	14873375	Product=protein sar deficient 1 [BLAST2GO] | Calmodulin binding protein-like [AT1G73805]
Rs380300	R7	16289196	16291527	Product=replication factor c subunit 5-like [BLAST2GO] | replication factor C subunit 3 [AT1G77470]
Rs382550	R7	14664251	14665988	Product=ring u-box domain-containing protein [BLAST2GO] | RING/U-box superfamily protein [AT1G73760]
Rs382530	R7	14873922	14876258	Product=rna processing factor 64-like protein [BLAST2GO] | hydroxyproline-rich glycoprotein family protein [AT1G73840]
Rs382650	R7	14588621	14589823	Product=rna recognition motif-containing protein [BLAST2GO] | RNA-binding (RRM/RBD/RNP motifs) family protein [AT1G73530]
Rs382730	R7	14528416	14530416	Product=s-adenosylmethionine-dependent methyltransferase domain-containing protein [BLAST2GO] | S-adenosyl-L-methionine-dependent methyltransferases superfamily protein [AT1G73320]
Rs377750	R7	15472224	15473254	Product=saur family protein [BLAST2GO] | SAUR-like auxin-responsive protein family [AT1G75580]
Rs380350	R7	16154021	16166540	Product=sec14p-like phosphatidylinositol transfer family protein [BLAST2GO] | Sec14p-like phosphatidylinositol transfer family protein [AT1G75370]
Rs382870	R7	14430607	14431888	Product=snf7 family protein [BLAST2GO] | SNF7 family protein [AT1G73030]
Rs382700	R7	14546592	14550532	Product=sucrose synthase 6 [BLAST2GO] | sucrose synthase 6 [AT1G73370]
Rs382930	R7	14341282	14343867	Product=survival phosphatase nucleotidase [BLAST2GO] | Survival protein SurE-like phosphatase/nucleotidase [AT1G72880]
Rs380960	R7	15487017	15488709	Product=transcription initiation factor iif subunit beta-like [BLAST2GO] | Transcription initiation factor IIF, beta subunit [AT1G75510]
Rs381390	R7	15878059	15880928	Product=trihelix transcription factor gt-2-like [BLAST2GO] | Duplicated homeodomain-like superfamily protein [AT1G76880]
Rs381850	R7	15301748	15303417	Product=two-component response regulator arr5 [BLAST2GO] | response regulator 15 [AT1G74890]
Rs380910	R7	16074977	16078877	Product=vacuolar protein sorting-associated protein 45 homolog [BLAST2GO] | vacuolar protein sorting 45 [AT1G77140]
Rs380940	R7	16108093	16112334	Product=wound-responsive family protein [BLAST2GO] | Best-Hit: BEST Arabidopsis thaliana protein match is: wound-responsive family protein (TAIR:AT1G21610.1) [AT1G77310]
Rs382130	R7	15080513	15081713	Product=zinc finger family protein [BLAST2GO] | RING/U-box superfamily protein [AT1G74370]
Rs380710	R7	15937222	15942309	Product=zinc finger protein [BLAST2GO] | Regulator of chromosome condensation (RCC1) family with FYVE zinc finger domain [AT1G76950]
