# Supplementary material for: QTL mapping for Fusarium wilt resistance based on the whole-genome resequencing and their association with functional genes in Raphanus sativus
Source: Research Square preprint supplement (doi:10.21203/rs.3.rs-208414/v1), 2021-02-18
Supplement: Supplementary file 2 [file b775ffbb9bf5598711b52cc3.xlsx]

## Sheet: Table S4
Additional file 1: Table S4. List of primers for checking the expression of 6 R genes and 13 unknown genes
Primer name	Forward(5'-3')	Reverse(5'-3')	Expected size(bp)
Rs382950_RT	ACCACCATTGCCAAGTATCT	ATCCACATCATCAAGCACAG	237
Rs382940_RT	TCCACAGCTTTTCAAAGTCA	CAGACCTCTTGGAGAAGGAA	227
Rs382860_RT	TGTGTTGGTTTTGGTTCTTG	CAATACCGTGAGCTCCTCTT	197
Rs382200_RT	ATAACCCAACAAACCAAGGA	GGCCGAGAAGTTCTTGAATA	164
Rs382850_RT	TGTGTTGGTTTTGGTTCTTG	CAATACCGTGAGCTCCTCTT	197
Rs383100_RT	ACCCTTCGAGCTCTTCTAAC	AGGACACTTTTCCTTGTCGT	161
Rs382720_RT	AGAAGCTCCTCACTGGAATC	AAGTCTCATGCATCTCATCG	317
Rs382060_RT	AACGATGATGGTAGAGACGA	TGGGATTCACAAAAGAGATG	186
Rs381550_RT	GGTTTCTTCAGCAGTTCACA	GATCAAAGAAGGCCAGAAGT	184
Rs381540_RT	GGGAAACCTACCGATTAAAA	TTTCTTCGTGGATTGTTGAC	157
Rs381090_RT	CTCCGACCATAACGATACAG	GCTAGCTCGAGTAGGAGGAG	159
Rs381290_RT	CAAGAAACAGTGTGAGCTTGA	ACCTCTCTTTGAGCTTCGAC	155
Rs381310_RT	ATCGAACTGAGGCAGAGG	GAATCCTCCGGTCAAAGC	152
Rs381320_RT	GGAATATGCACGCTCTTATG	GATGGAAGTGACATTGATGG	224
Rs381330_RT	CTCCGAAGCTTTGACTTGTA	GTGCTAGTCAGCGAAGAGAA	244
Rs381350_RT	TCCAAGGTACGATGATTCTG	AGAAAGCCATCGAGGACTAC	191
Rs380750_RT	CATACGCTAATCCCAACAAG	AAGCGACCAAAGGTCTCTAC	178
Rs380950_RT	TGGAAATTGGGTTGTGGG	GAAGAATGAGCTTTGCGT	208
