# Supplementary material for: QTL mapping for Fusarium wilt resistance based on the whole-genome resequencing and their association with functional genes in Raphanus sativus
Source: Research Square preprint supplement (doi:10.21203/rs.3.rs-208414/v1), 2021-02-18
Supplement: Supplementary file 3 [file f66d46eac7b2a6e1d93be1a2.xlsx]

## Sheet: Table S3
Additional file 1: Table S3. List of primers used for check two genes in parental lines
Primer name	Forward(5'-3')	Reverse(5'-3')	PCR product(bp)
Rs382940_P1	TCCACAGCTTTTCAAAGTCA	CAGACCTCTTGGAGAAGGAA	227
Rs382940_P2	CGTGCGTAGAAGTTTGGT	TGAGAGGAGAAGCCAGGT	401
Rs382940_P3	CCAACAGCCTAGTTACCA	AGCCAACTCACATCTTTCA	522
Rs382940_P4	GTTCTGACTTGGGCTCTG	TCCCTGTCCTCTTTGGTT	489
Rs382940_P5	GAGCTGGTGTTTGGATGA	TATGCGGAGTAGACAAGA	501
Rs382200_P1	ATAACCCAACAAACCAAGGA	GGCCGAGAAGTTCTTGAATA	164
Rs382200_P2	AACACGATCGAAGGCTCA	GCCACAGAAGAGAAGTCAA	987
Rs382200_P3	TGAACTGGCTAAAATGGG	GGGTAAGGTTGAGGAATG	417
Rs382200_P4	CATTCCTCAACCTTACCC	GATAAGAAACCTCCAAGAAC	496
Rs382200_P5	CCAGATGCAGAGTTTAAAG	AGAGCAGAGAGGAAAGAA	503
